# Supplementary material for: To Seek Program Accreditation, Innovation, or Both?—Examining the Interdependencies in High-Reliability Health Care Organizations
Source: Springer Nature journal article supplement (doi:10.1007/s41471-023-00168-w), 2023-09-14
Supplement: MOESM2 [file 26045222]

**To Seek Program Accreditation, Innovation, or Both? – Examining the Interdependencies in High-Reliability Health Care Organizations**

Tim Brand1, Eva Goetjes1 and Katharina Blankart2

1 Research Associate, CINCH Health Economics Research Center, University of Duisburg-Essen, Essen, Germany

2 Assistant Professor, CINCH Health Economics Research Center, University of Duisburg-Essen, Essen, Germany

Submitted to: Schmalenbach Journal of Business Research; “Special Issue Transformation”

**Corresponding author:**

Tim Brand

tim.brand@uni-due.de

# Online Resource 2 Consolidated criteria for reporting qualitative studies (COREQ): 32-item checklist[[1]](#footnote-1)

| **No. Item** | **Guide questions/description** | **Commentary** |
| --- | --- | --- |
| **Domain 1: Research team and reﬂexivity** | | |
| ***Personal Characteristics*** | | |
| 1. Interviewer/facilitator | Which author/s conducted the interview or focus group? | All interviews were conducted by the first author (T.B.) |
| 2. Credentials | What were the researcher’s credentials? E.g. PhD, MD | The main researcher has a master degree in health economics |
| 3. Occupation | What was their occupation at the time of the study? | At the time of the study the main researcher was a PhD candidate |
| 4. Gender | Was the researcher male or female? | Male |
| 5. Experience and training | What experience or training did the researcher have? | At the time of the study the main researcher had five years of interview experience |
| ***Relationship with participants*** | | |
| 6. Relationship established | Was a relationship established prior to study commencement? | Prior to the study there was no relationship between the participants and the research team |
| 7. Participant knowledge of the interviewer | What did the participants know about the researcher? e.g. personal goals, reasons for doing the research | All participants were informed about the study and the underlying research interests |
| 8. Interviewer characteristics | What characteristics were reported about the interviewer/facilitator? e.g. Bias, assumptions, reasons and interests in the research topic | Participants were informed about the professional background of the main researcher |
| **Domain 2: study design** | | |
| ***Theoretical framework*** | | |
| 9. Methodological orientation and Theory | What methodological orientation was stated to underpin the study? e.g. grounded theory, discourse analysis, ethnography, phenomenology, content analysis | The study builds on a grounded theory approach |
| ***Participant selection*** | | |
| 10. Sampling | How were participants selected? e.g. purposive, convenience, consecutive, snowball | Participants were selected in a heterogeneity sampling approach focusing on regional and organizational characteristics |
| 11. Method of approach | How were participants approached? e.g. face-to-face, telephone, mail, email | Interview invitations were sent by email. Reminders were sent by email or telephone |
| 12. Sample size | How many participants were in the study? | 11 physicians and 14 quality managers participated in the study |
| 13. Non-participation | How many people refused to participate or dropped out? Reasons? | Invitations were sent to 137 physicians and 69 quality managers. 126 and 55 resp. did not respond or refused to participate in the study without giving reasons |
| ***Setting*** | | |
| 14. Setting of data collection | Where was the data collected? e.g. home, clinic, workplace | The interviews were conducted online (Zoom) or by telephone. The majority of participants were in their workplace |
| 15. Presence of non-participants | Was anyone else present besides the participants and researchers? | No |
| 16. Description of sample | What are the important characteristics of the sample? e.g. demographic data, date | See Table 1 |
| ***Data collection*** | | |
| 17. Interview guide | Were questions, prompts, guides provided by the authors? Was it pilot tested? | The guide was piloted with each one physician and quality manager.  The interview guide was provided on demand of the participants |
| 18. Repeat interviews | Were repeat interviews carried out? If yes, how many? | No |
| 19. Audio/visual recording | Did the research use audio or visual recording to collect the data? | All interviews were recorded after obtaining permission |
| 20. Field notes | Were ﬁeld notes made during and/or after the interview or focus group? | No |
| 21. Duration | What was the duration of the interviews or focus group? | The interviews lasted between 14 and 79 minutes (mean: 42 minutes) |
| 22. Data saturation | Was data saturation discussed? | Yes. See section “3.2 Data collection and sample” |
| 23. Transcripts returned | Were transcripts returned to participants for comment and/or correction? | Transcripts were returned to one participant on demand. No objections were raised |
| **Domain 3: analysis and ﬁndings** | | |
| ***Data analysis*** | | |
| 24. Number of data coders | How many data coders coded the data? | One author (T.B.) coded all interviews. A second author (E.G.) coded a subset of interviews. |
| 25. Description of the coding tree | Did authors provide a description of the coding tree? | An excerpt of the coding tree is presented in Figure 1 |
| 26. Derivation of themes | Were themes identiﬁed in advance or derived from the data? | Themes were derived from the data |
| 27. Software | What software, if applicable, was used to manage the data? | MaxQDA 2020 |
| 28. Participant checking | Did participants provide feedback on the ﬁndings? | The results were sent to each one physician and one quality manager for feedback. No objections were raised |
| ***Reporting*** | | |
| 29. Quotations presented | Were participant quotations presented to illustrate the themes/ﬁndings? Was each quotation identiﬁed? e.g. participant number | Selected quotations are presented in the paper. Quotations are identified with participant role and number. |
| 30. Data and ﬁndings consistent | Was there consistency between the data presented and the ﬁndings? | The data and findings are consistent. Backwards validation was conducted within the research team |
| 31. Clarity of major themes | Were major themes clearly presented in the ﬁndings? | Major themes are presented in the conceptual model; Figure 2 |
| 32. Clarity of minor themes | Is there a description of diverse cases or discussion of minor themes? | Minor themes that are subject to different characteristics of participants` organizations are discussed in the paper |

1. Developed from: Tong A, Sainsbury P, Craig J. Consolidated criteria for reporting qualitative research (COREQ): a 32-item checklist for interviews and focus groups. *International Journal for Quality in Health Care*. 2007. Volume 19, Number 6: pp. 349 – 357 [↑](#footnote-ref-1)
